# Supplementary material for: Genomic structure of the horse major histocompatibility complex class II region resolved using PacBio long-read sequencing technology
Source: PubMed Central journal article supplement (PMC5374520; doi:10.1038/srep45518), 2017-03-31
Supplement: srep45518-s1.pdf [file srep45518-s1.pdf]

**Genomic structure of the horse major histocompatibility complex class II region resolved using  
PacBio long-read sequencing technology**

Agnese Viļuma, Sofia Mikko, Daniela Hahn, Loren Skow, Göran Andersson, Tomas F. Bergström

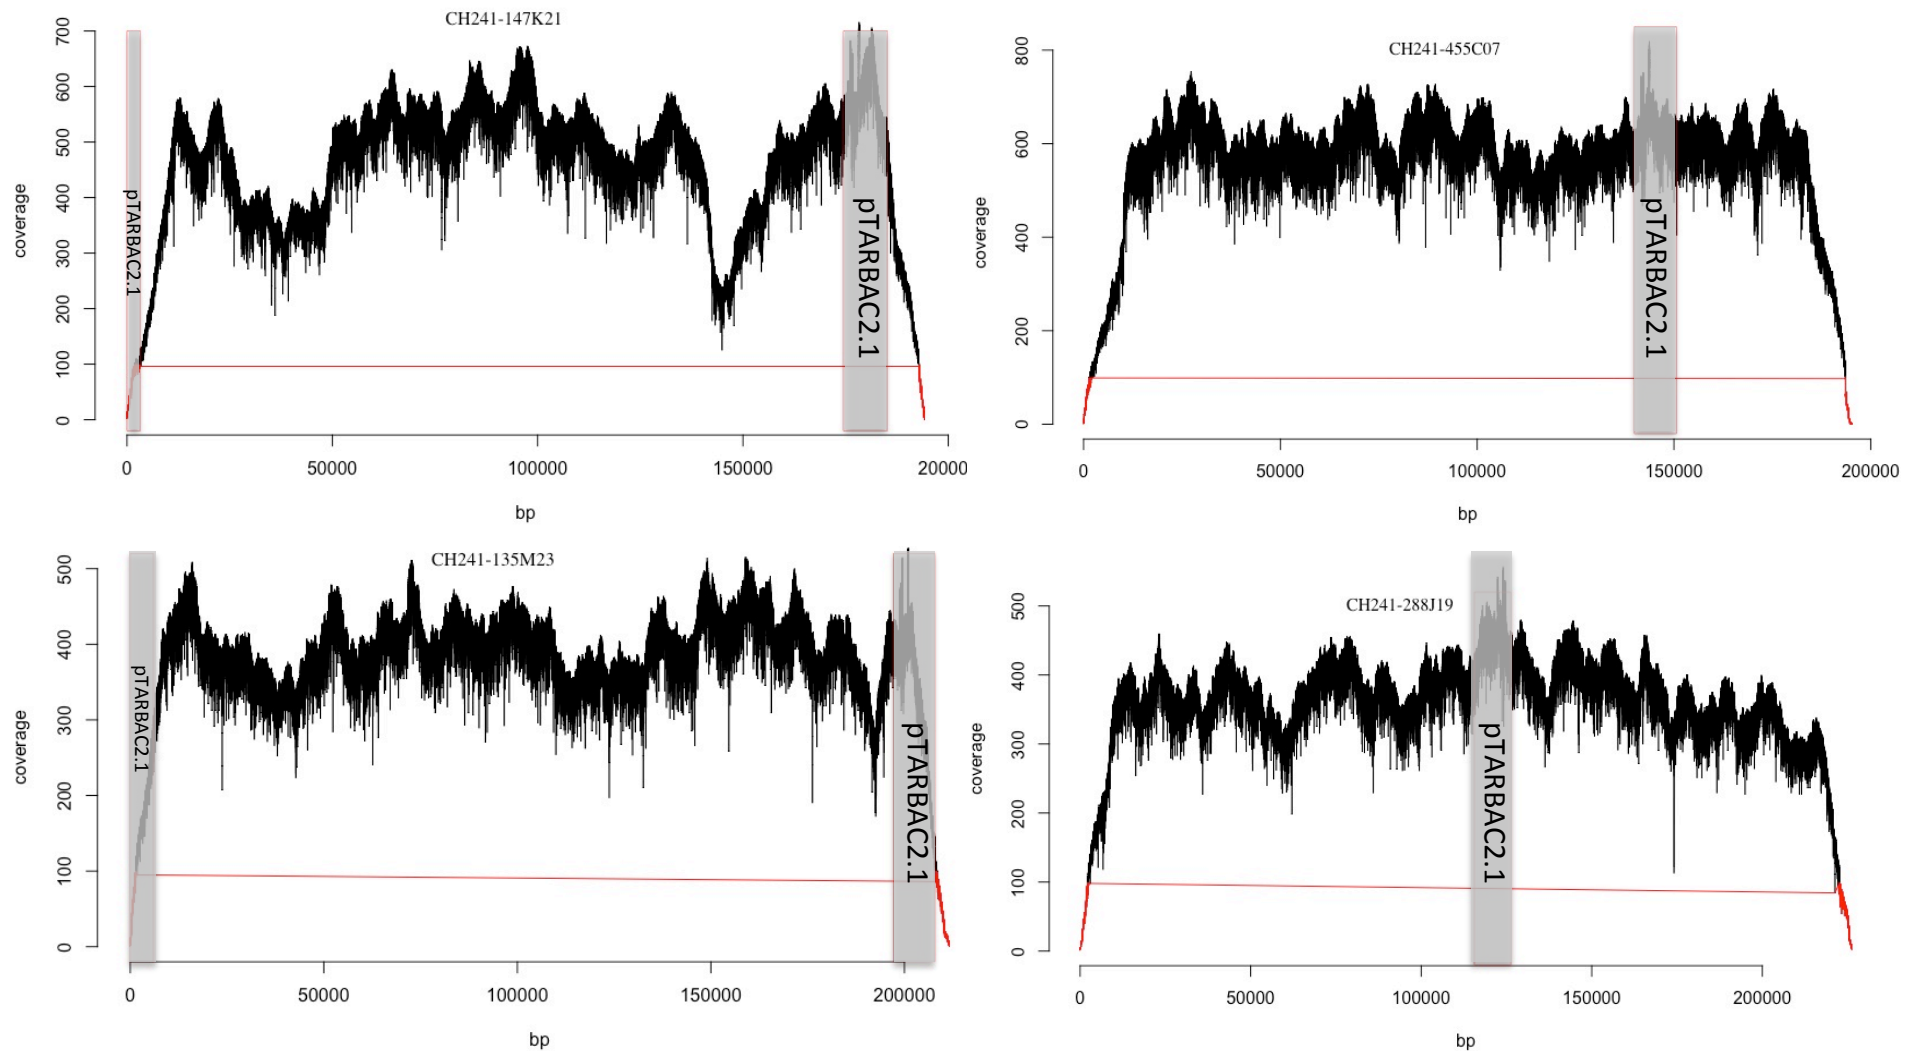

**Supplementary Figure S1.** Coverage of each randomly linearized BAC clone construct assembly, where the position(s) of the pTARBAC2.1 vector is shown as a grey box. Coverage describes the number of filtered subreads supporting each base pair of the final assembly. The threshold for end trimming is indicated as a red vertical line.

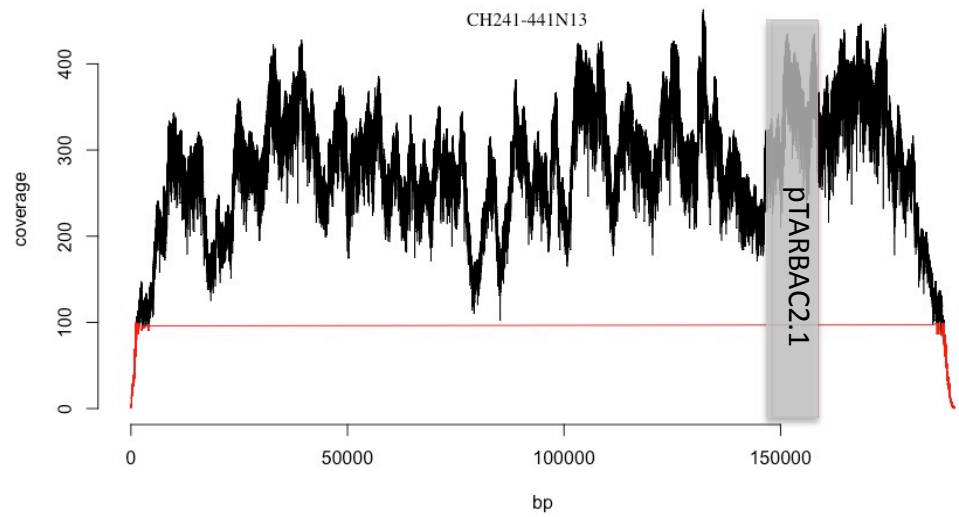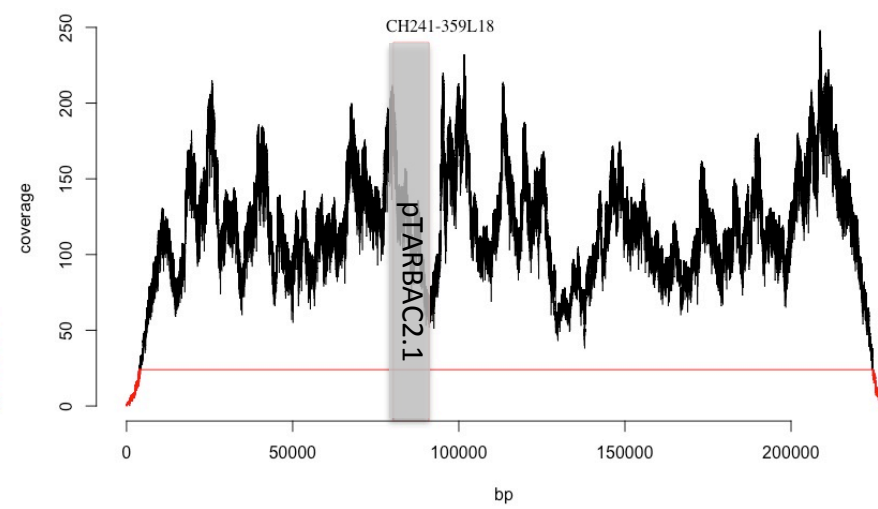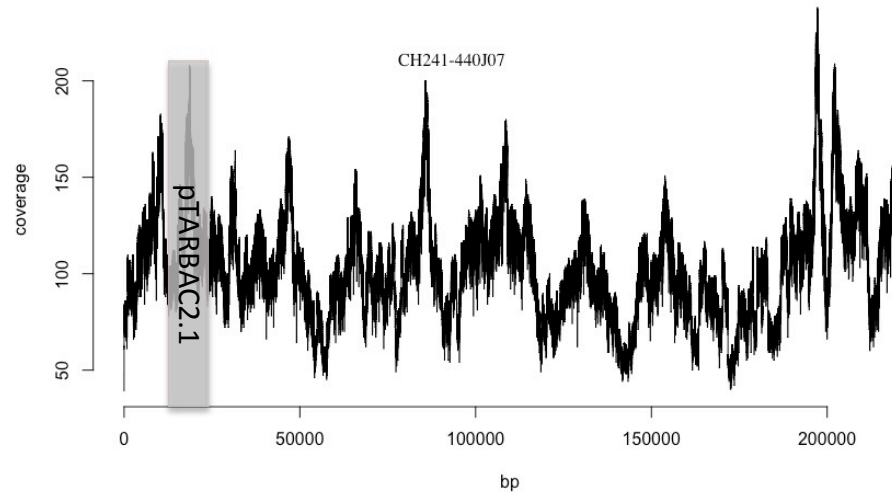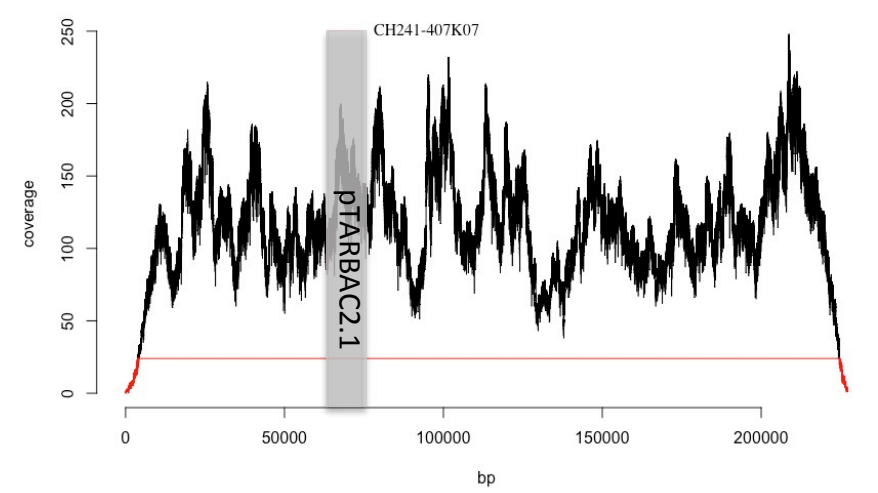

Supplementary Figure S1 continued.

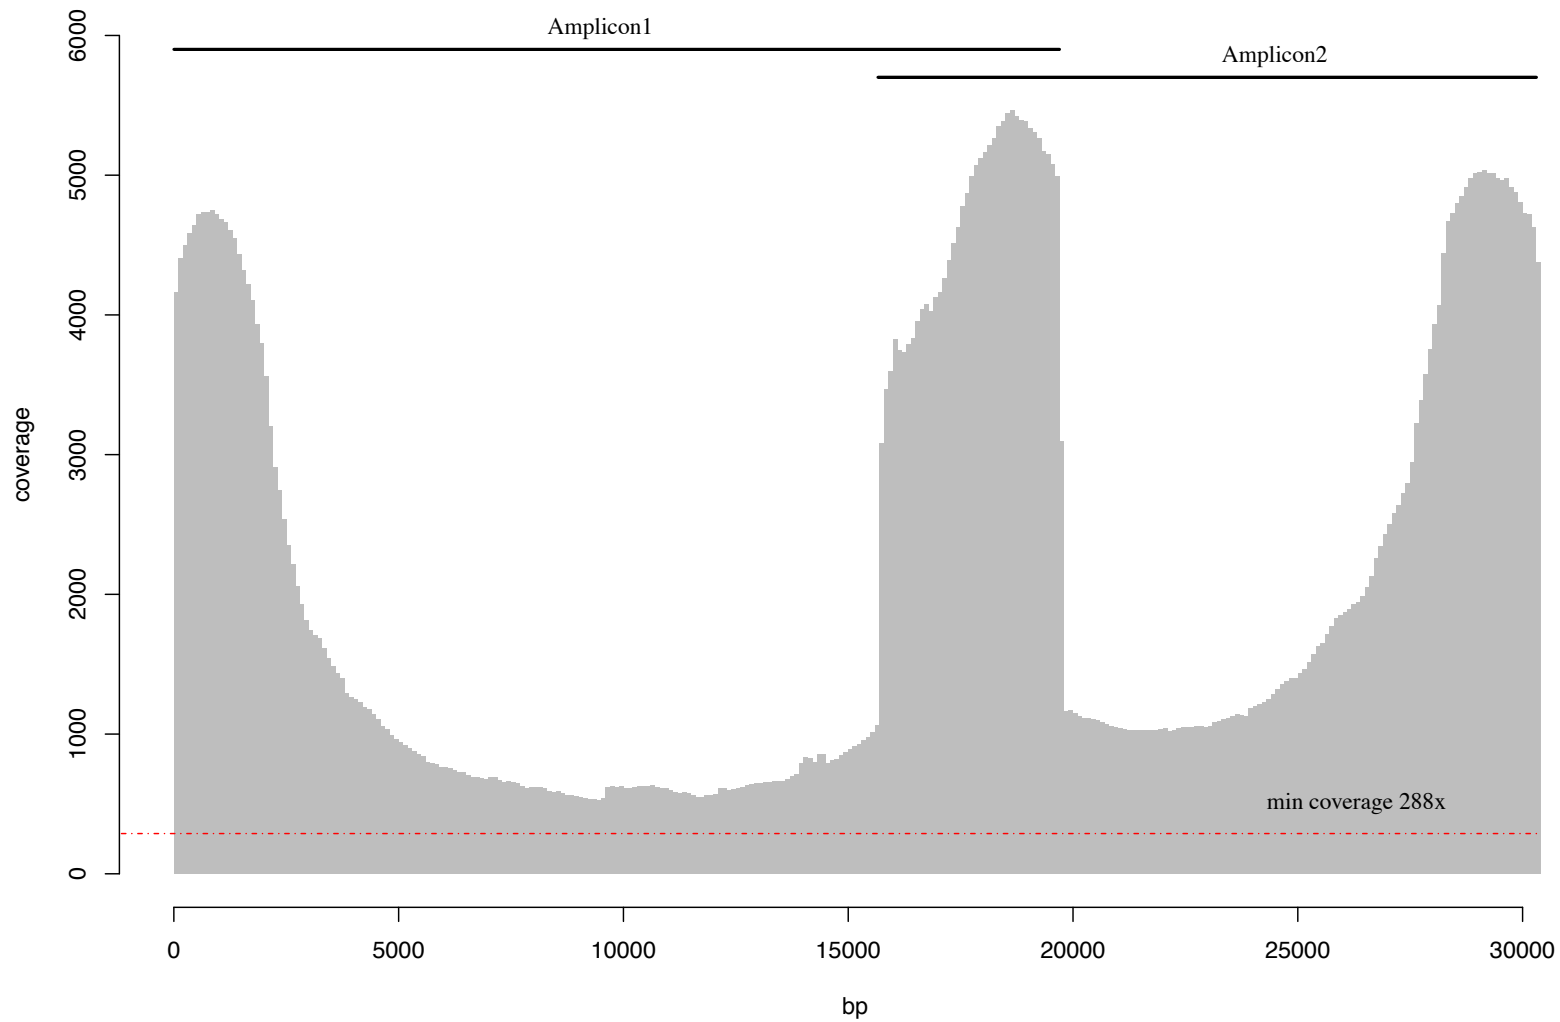

**Supplementary Figure S2.** Overview of the two long-range PCR amplicon coverage. Coverage describes the number of reads of insert covering each base pair of the final amplicon assembly. Red dotted line indicates the minimum observed per base coverage.

CLUSTAL O(1.2.3) multiple sequence alignment

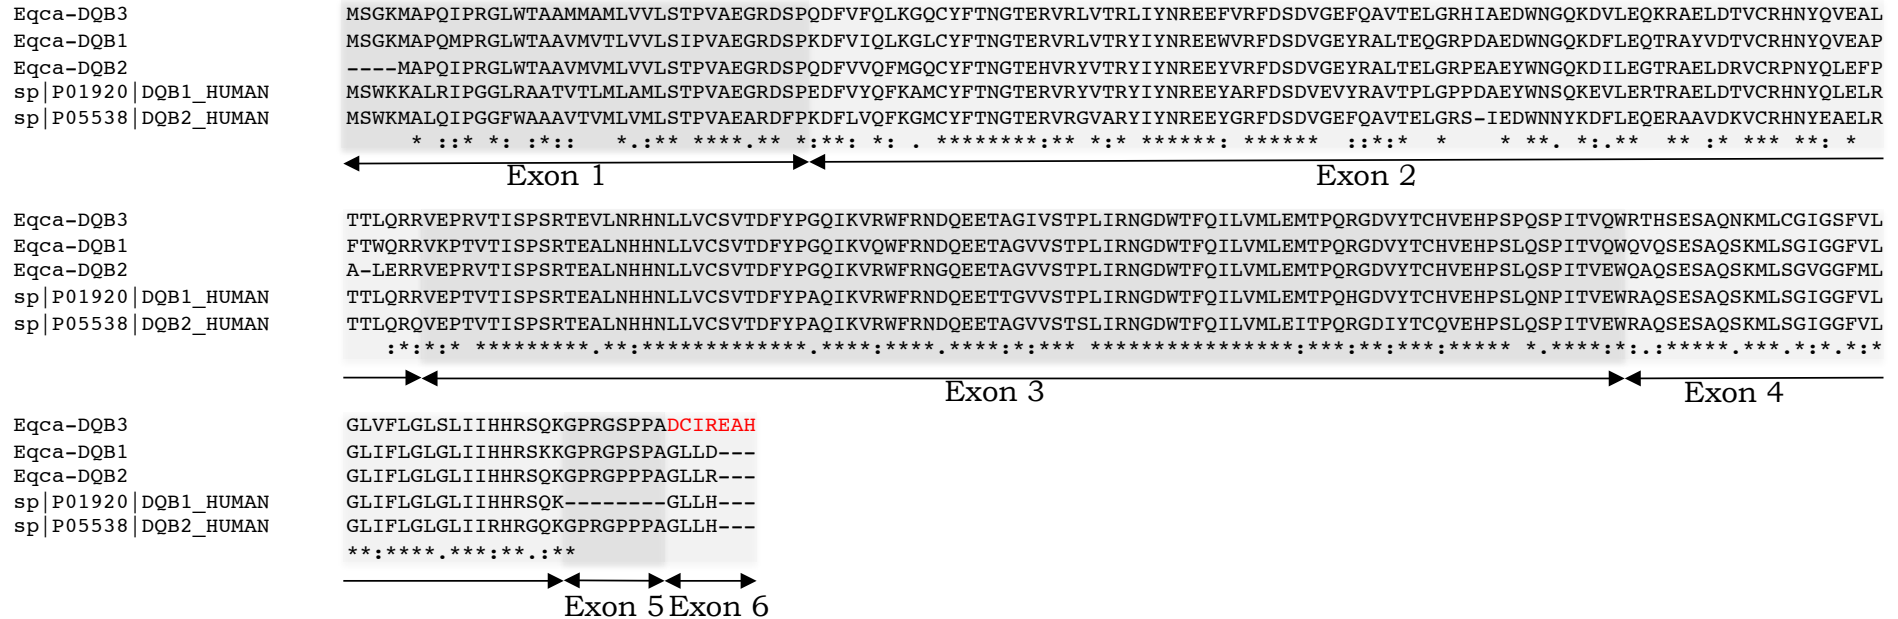

**Supplementary Figure S3.** Multiple alignment (ClustalO, <http://www.ebi.ac.uk/Tools/msa/clustalo/>) of the predicted protein sequences of the three functional *Eqca-DQB* genes and *HLA-DQB1* (P01920) and *-DQB2* (P05538). The amino acid sequence of the *Eqca-DQB3* exon 6 is highlighted in red.

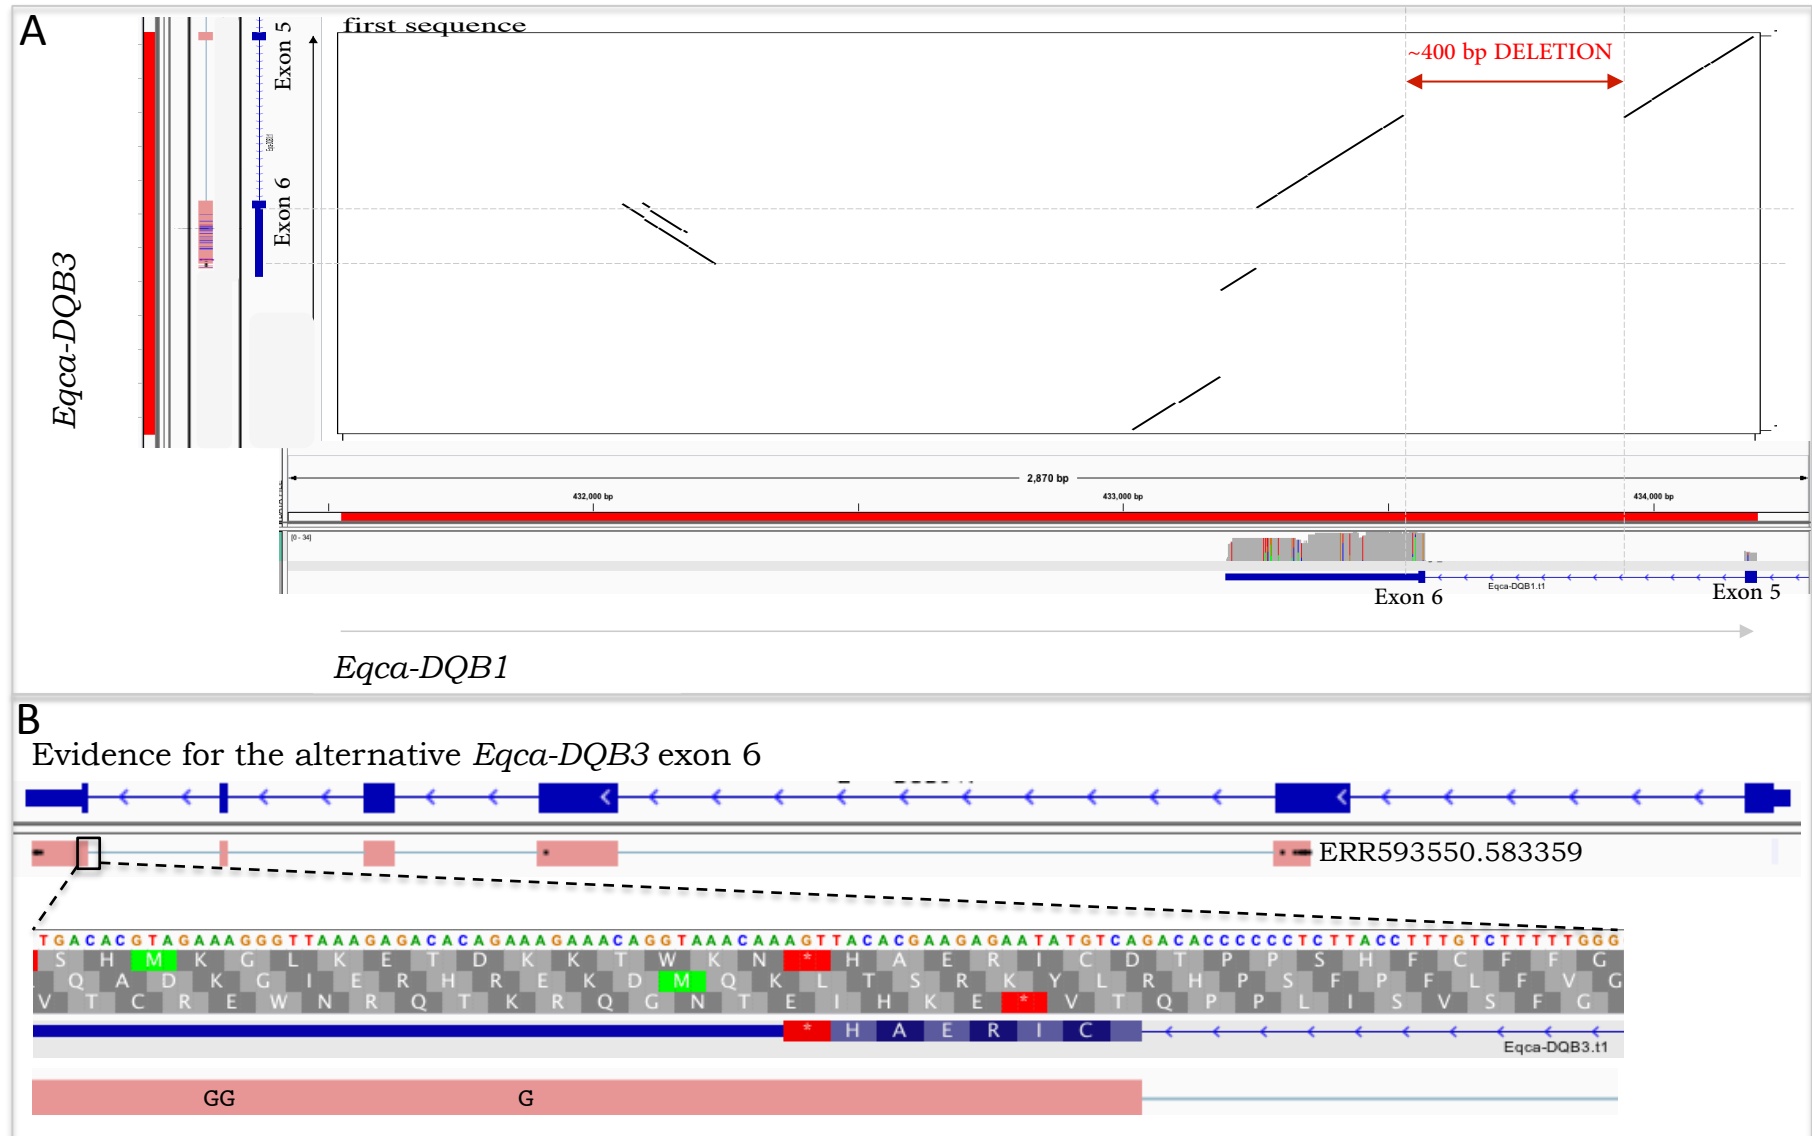

**Supplementary Figure S4.** A) Dot-plot comparison of the *Eqca-DQB3* and *Eqca-DQB1* genomic sequence. The 400 bp deletion of the *Eqca-DQB3* sequence spans a portion of intron 5 and the entire protein coding sequence of exon 6 of *Eqca-DQB1*. The annotation tracks (in blue) are displayed below (*Eqca-DQB1*) and on the left side (*Eqca-DQB3*) of the dot-plot. B) The RNA-seq read (Roche 454) supporting the alternative exon 6 of *Eqca-DQB3* (in pink).

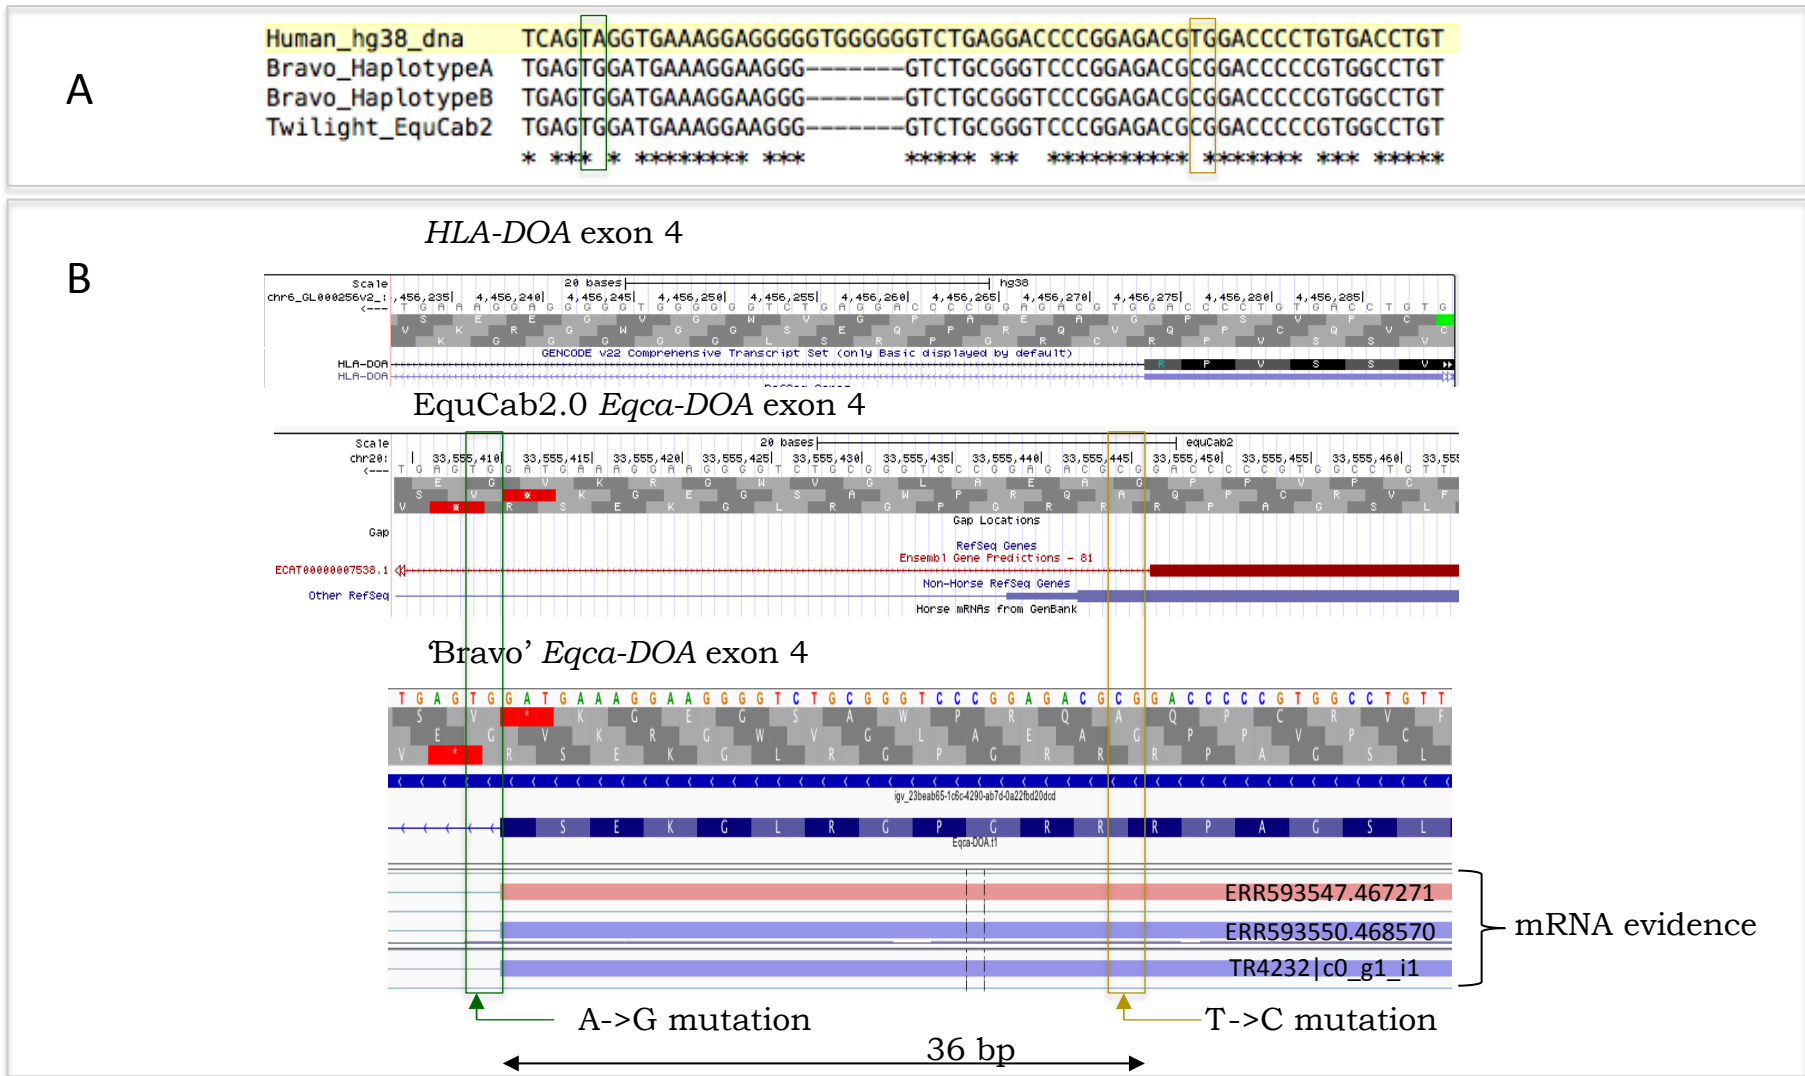

**Supplementary Figure S5.** Figure illustrates the alternative donor splice site of the *Eqca-DOA* exon 4. A) Multiple sequence alignment of coding sequences at the 3' end of exon 4 and 5' end of intron 5 of the *MHC-DOA* gene in human, Bravo haplotypes and EquCab2 assembly. The human splice site mutation and the alternative canonical splice site of the horse are highlighted with yellow and green boxes, respectively. B) Annotation tracks from the UCSC genome browser (*HLA-DOA* and EquCab2 *Eqca-DOA*) and from the IGV visualization tool (Bravo *Eqca-DOA*) illustrate the current annotation of these genes. Aligned mRNA evidence supporting the alternative canonical splice site of the extended exon 4 is shown in contrast to the RefSeq Genes and Ensembl Gene Predictions.

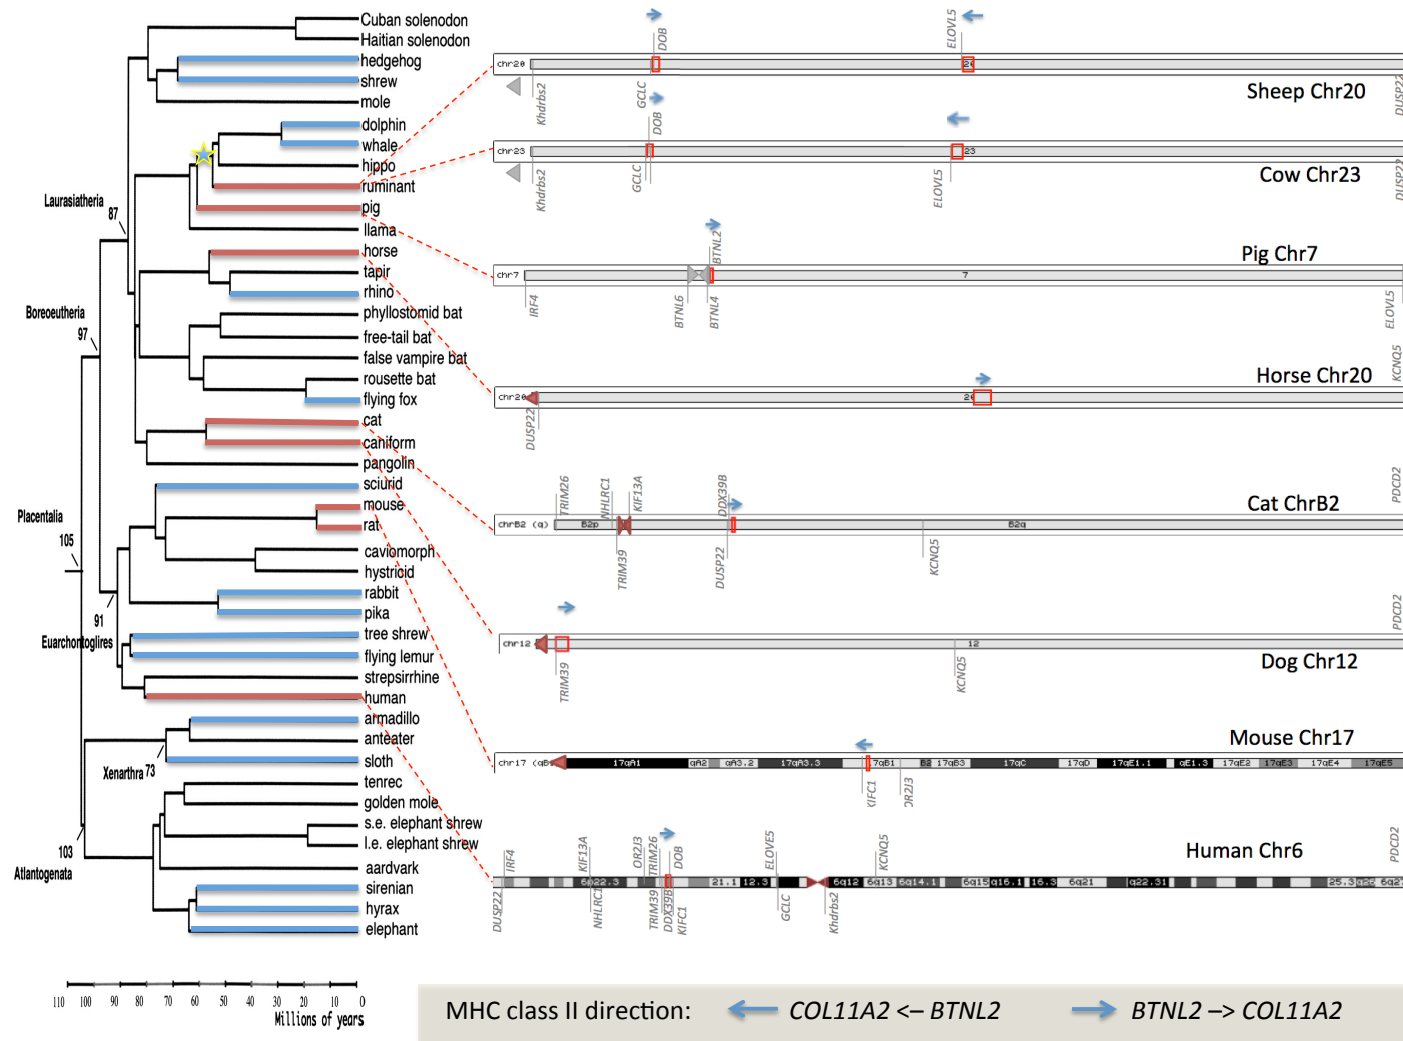

**Supplementary Figure S6.** This figure illustrates our choice of species for comparative analysis according to their evolutionary distance, genome and annotation completeness. Phylogenetic branches in blue represent species where genome assemblies are present as separate scaffolds and/or lack proper annotation. Phylogenetic branches in red represent species with a reliable MHC class II assembly and annotation (e.g. specific publications, *RefSeq* gene annotation). Chromosomal location of the MHC class II region is indicated with a red box and the directionality is shown with a blue arrow. For ruminants, two well annotated sequences of cattle and sheep MHC class II region are available. Both of these sequences share a characteristic of the split MHC class II region due to an ancestral inversion (indicated with a star). In our species comparison (Figure 4), we retained cattle as a representative of the ruminants.

Phylogenetic tree from: Murphy, W. J., Pringle, T. H., Crider, T. A., Springer, M. S. & Miller, W. Using genomic data to unravel the root of the placental mammal phylogeny. *Genome research* **17**, 413-421, doi:10.1101/gr.5918807 (2007).



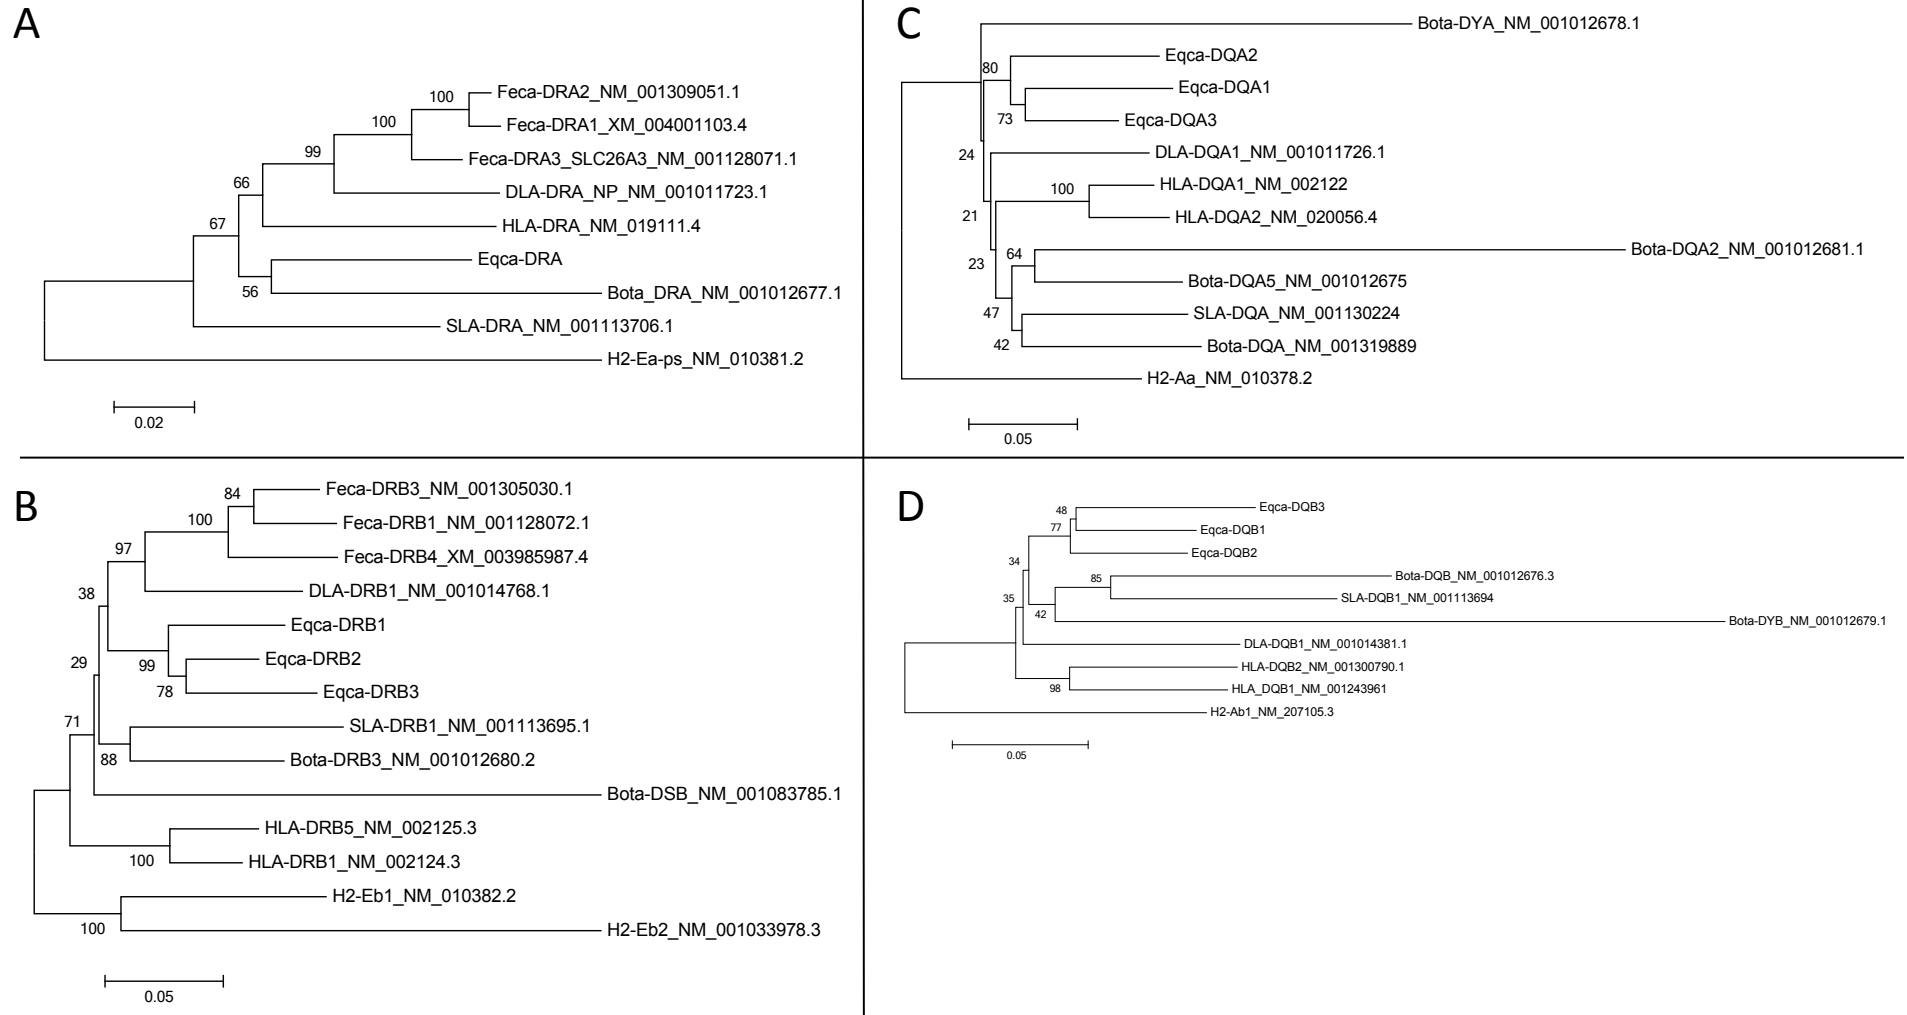

**Supplementary Figure S7.** Phylogenetic relationship of seven mammalian *MHC-DRA*, *-DRB*, *-DQA* and *DQB* loci are illustrated in the sections A, B, C and D, respectively. Neighbor-Joining trees were constructed from estimated Jukes-Cantor distances (pairwise deletion) of CDS and the robustness of the branching order was estimated by 10,000 bootstrap replications. Gene names are followed by a RefSeq accession number for each sequence.

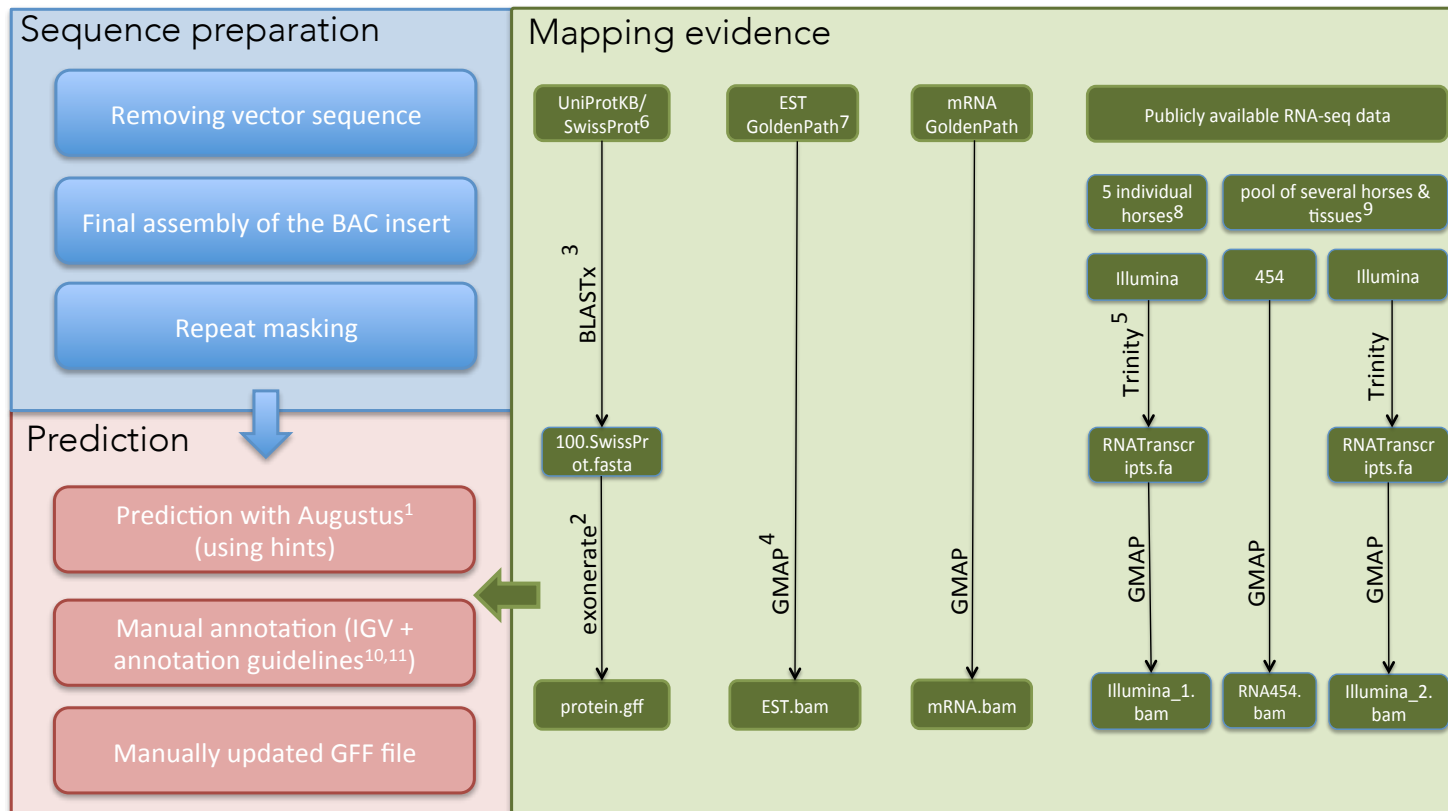

**Supplementary Figure S8.** A schematic overview of the automated annotation pipeline and tools involved.

1. Stanke, M. & Waack, S. Gene prediction with a hidden Markov model and a new intron submodel. *Bioinformatics (Oxford, England)* **19 Suppl 2**, ii215-225 (2003).
2. Slater, G. S. C. & Birney, E. Automated generation of heuristics for biological sequence comparison. *BMC bioinformatics* **6**, 1-11, doi:10.1186/1471-2105-6-31 (2005).
3. <http://blast.ncbi.nlm.nih.gov/Blast.cgi>
4. Wu, T. D., Reeder, J., Lawrence, M., Becker, G. & Brauer, M. J. GMAP and GSNAP for Genomic Sequence Alignment: Enhancements to Speed, Accuracy, and Functionality. *Methods in molecular biology (Clifton, N.J.)* **1418**, 283-334, doi:10.1007/978-1-4939-3578-9\_15 (2016).
5. Slater, G. S. C. & Birney, E. Automated generation of heuristics for biological sequence comparison. *BMC bioinformatics* **6**, 1-11, doi:10.1186/1471-2105-6-31 (2005).
6. Consortium, T. U. UniProt: a hub for protein information. *Nucleic acids research* **43**, D204-D212, doi:10.1093/nar/gku989 (2015).
7. <http://hgdownload.cse.ucsc.edu/downloads.html>
8. Hestand, M. S. et al. Annotation of the Protein Coding Regions of the Equine Genome. *PLoS One* **10**, e0124375, doi:10.1371/journal.pone.0124375 (2015).
9. Pacholewska, A. et al. The transcriptome of equine peripheral blood mononuclear cells. *PLoS One* **10**, e0122011, doi:10.1371/journal.pone.0122011 (2015).
10. Laurens Wilming, A. F., Jane Loveland, Jonathan Mudge, Charles Steward, Jennifer Harrow, HAVANA team. HAVANA annotation guidelines. **48** (2012).
11. Misra, S. et al. Annotation of the *Drosophila melanogaster* euchromatic genome: a systematic review. *Genome biology* **3**, RESEARCH0083 (2002).

**Supplementary Table S1. Genotyping results of the SNP and INDEL dense regions observed in junctions five and six.**

| Region No.   | Genomic location in MHC class II | Expected* |          | Confirmed |          |                |
|--------------|----------------------------------|-----------|----------|-----------|----------|----------------|
|              |                                  | SNPs      | INDELs   | SNPs      | INDELs   | Method         |
| 1            | 926,154-926,727                  | 4         | 1        | 4         | 0        | Sanger-seq     |
| 2            | 957,974-958,934                  | 16        | 2        | 16        | 2        | Sanger-seq     |
| 3            | 1,012,387-1,013,364              | 10        | 1        | 9         | 1        | Sanger-seq     |
| 4            | 1,066,875-1,067,709              | 7         | 0        | 7         | 0        | Sanger-seq     |
| 5            | 1,088,221-1,089,269              | 9         | 0        | 9         | 0        | Sanger-seq     |
| 247 bp INDEL | 1,016,235-1,017,082              | 0         | 1        | 0         | 1        | 4% agarose gel |
| <b>Sum:</b>  |                                  | <b>46</b> | <b>5</b> | <b>45</b> | <b>4</b> |                |

\*Expected number of SNPs and INDELs based on PacBio sequencing of the BAC clones

**Supplementary Table S2. Summary of the long-range PCR amplicon sequencing results.**

|                                     | Expected length (bp) | Observed length (bp) |
|-------------------------------------|----------------------|----------------------|
| Amplicon 1                          | 16,512               | 19,701               |
| Amplicon 2                          | 12,953               | 14,649               |
| Assembly of Amplicon 1 and 2        | 28,151               | 30,309               |
| Amplicon 1 and 2 overlap            | 1,314                | 4,041                |
| CH241-135M23 and Amplicon 1 overlap | 122                  | 122                  |
| CH241-455C07 and Amplicon 2 overlap | 394                  | 394                  |

**Supplementary Table S3. Gene content of the BAC clone sequences.**

| BAC ID       | No. of genes | Genes                                                                        | No. of pseudo-genes | Pseudogenes                     |
|--------------|--------------|------------------------------------------------------------------------------|---------------------|---------------------------------|
| CH241-407K07 | 3            | <i>LOC504295, LOC525599, BTNL2</i>                                           | 1                   | <i>Eqca-G</i>                   |
| CH241-288J19 | 4            | <i>BTNL2*, Eqca-DRA, -DRB1, -DQA1</i>                                        | 2                   | <i>SIRPA, Eqca-DQB4</i>         |
| CH241-441N13 | 2            | <i>Eqca-DQA1, -DQB1</i>                                                      | 2                   | <i>Eqca-DQA4, -DQB4</i>         |
| CH241-440J07 | 2            | <i>Eqca-DQB1, -DQA2</i>                                                      | 2                   | <i>Eqca-DQA4, -DRB4</i>         |
| CH241-135M23 | 5            | <i>Eqca-DQA2, -DQB2, -DQA3, -DQB3, -DRB2</i>                                 | 2                   | <i>RPS27, Eqca-DOB2</i>         |
| CH241-455C07 | 2            | <i>Eqca-DRB3, -DOB1</i>                                                      | 3                   | <i>Eqca-DRB5, -DOB3, -DRB6,</i> |
| CH241-147K21 | 9            | <i>Eqca-DOB1*, TAP2, PSMB8, TAP1, PSMB9, Eqca-DMB, -DMA, BRD2, Eqca-DOA*</i> | 0                   | -                               |
| CH241-359L18 | 8            | <i>PSMB8, TAP1, PSMB9, Eqca-DMB, -DMA, BRD2, Eqca-DOA, COL11A2*</i>          | 2                   | <i>Eqca-DPB1, -DPB2</i>         |

\*partial gene

**Table S4. Identity to known MHC-IPD alleles.**

| Gene             | Most identical MHC-IPD allele | Accession No. | Nucleotide identity (%) |
|------------------|-------------------------------|---------------|-------------------------|
| <i>Eqca-DRA</i>  | <i>Eqca-DRA*00101</i>         | JQ254080      | 100                     |
| <i>Eqca-DRB1</i> | <i>Eqca-DRB1*00101</i>        | JQ254085      | 100                     |
| <i>Eqca-DRB2</i> | <i>Eqca-DRB2*00201</i>        | JQ254091      | 99.6                    |
| <i>Eqca-DRB3</i> | <i>Eqca-DRB3*00201</i>        | JQ254099      | 99.0                    |
| <i>Eqca-DQA1</i> | <i>Eqca-DQA1*00101</i>        | JQ254060      | 100                     |
| <i>Eqca-DQA2</i> | <i>Eqca-DQA2*00101</i>        | JQ254064      | 100                     |
| <i>Eqca-DQA3</i> | <i>Eqca-DQA3*00101</i>        | JQ254068      | 100                     |
| <i>Eqca-DQB1</i> | <i>Eqca-DQB1*00101</i>        | JQ254070      | 99.9                    |
| <i>Eqca-DQB2</i> | <i>Eqca-DQB2*00101</i>        | JQ254075      | 100                     |
| <i>Eqca-DQB3</i> | <i>Eqca-DQB3*00101</i>        | JQ287623      | 100                     |

**Supplementary Table S5. Primer sequences.**

|              | Forward primer 5'-3'         | Reverse primer 5'-3'        |
|--------------|------------------------------|-----------------------------|
| Amplicon 1   | M13F-ccttgcactctggactcacct   | M13R-tgcccactgctgtattcac    |
| Amplicon 2   | M13F-ggtcaccagaggagaacagg    | M13R-ttctcagcagtggtcttct    |
| Candidate 1  | M13F-gcaccaataacctgcaatgaa   | M13R-ctctctcgttctctggattcca |
| Candidate 2  | M13F-accagctgaccaccaatgta    | M13R-caacaagaatgaggccctgg   |
| Candidate 3  | M13F-gcctattgccaacattgcc     | M13R-ttgtgtaaggagccaggag    |
| Candidate 4  | M13F-tgggacagcactattaatgtaca | M13R-agcttcactctcctcctct    |
| Candidate 5  | M13F-aggccaaggacacagatcag    | M13R-tttcttctctcctcctggcc   |
| 247 bp INDEL | gtttgctgcactccactca          | aggccagctttgttttcatt        |

M13F: TGTA AAAACGACGGCCAGT;

M13R: CAGGAAACAGCTATGACC.

**Table S6. Detailed information of the sequences submitted to the European Nucleotide Archive.**

---

| ID               | Run accession No | Sequencing technology |
|------------------|------------------|-----------------------|
| CH241-147K21     | ERR1661471       | PacBio                |
| CH241-455C07     | ERR1661476       | PacBio                |
| CH241-135M23     | ERR1661475       | PacBio                |
| CH241-288J19     | ERR1661473       | PacBio                |
| CH241-440J07     | ERR1661470       | PacBio                |
| CH241-359L18     | ERR1661472       | PacBio                |
| CH241-407K07     | ERR1661469       | PacBio                |
| CH241-441N13     | ERR1661474       | PacBio                |
| Het_Region_Nr1   | ERR1661492       | Sanger-sequencing     |
| Het_Region_Nr2   | ERR1661493       | Sanger- sequencing    |
| Het_Region_Nr3   | ERR1661494       | Sanger- sequencing    |
| Het_Region_Nr4   | ERR1661495       | Sanger- sequencing    |
| Het_Region_Nr5   | ERR1661496       | Sanger- sequencing    |
| LR-PCR Amplicons | ERR1839600       | PacBio                |

---
